# Supplementary material
Source: publisher site journal article supplement (https://www.spandidos-publications.com/4436/downloadSupplementary)

Figure 1. Cell cycle histograms of vehicle, palbociclib, ICG-001 and combination treatment in MC-7 and TamR cells. TamR, tamoxifen-resistant MCF-7.

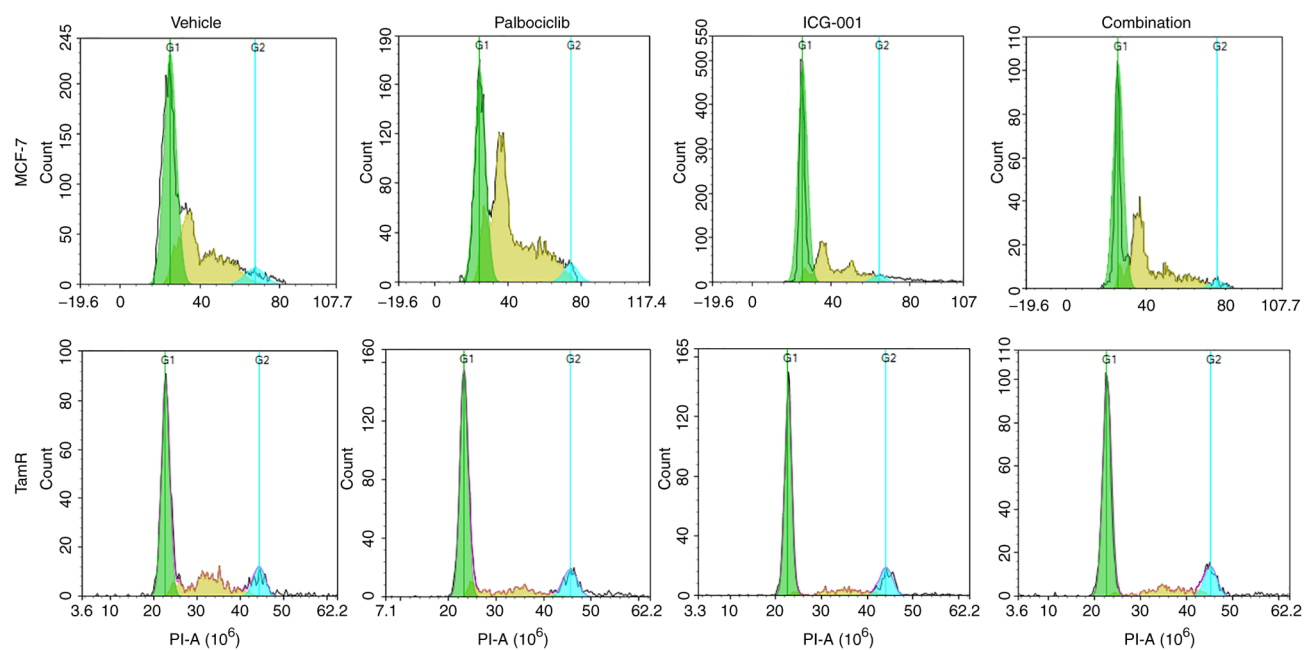

Supplement: Supplementary file 1 [file downloadSupplementary]
